# Supplementary material
Source: PubMed Central journal article supplement (PMC5362087)
Supplement: NIHMS48620-supplement-Table_S1.pdf [file NIHMS48620-supplement-Table_S1.pdf]

A

| <b>Primer</b>    | <b>Sequence</b>                                                        | <b>Annealing °C</b> |
|------------------|------------------------------------------------------------------------|---------------------|
| <b>Alox15</b>    | F: GTCTCCCTGCCCGCCTGGTA<br>R:TGGGGGATCCAAGGGCGTGA                      | 62                  |
| <b>Gbp1</b>      | F: AAAA ACTTCGGGGACAGCTT<br>R:CTGAGTCACCTCATAAGCCAAA                   | 54                  |
| <b>Tgfb2</b>     | F: AGAAGGCAAGCCGGAGGGCA<br>R: ATCCGCTGCTCGGCCACTCT                     | 61                  |
| <b>Cxcl13</b>    | F: ACCTCCAGGCAGAATGAGGCTCA<br>R: TCAGTTTTGGGGCAGCCATTCC                | 59                  |
| <b>Selp</b>      | F: CCTGGCAAGTGGAATGATGA<br>R: GAGCAGGTATAGCTCCCAA                      | 55                  |
| <b>Aspa</b>      | F: TGGTCCTCAGCCTCACGGTGT<br>R: ACGGTACAGTCTCCACCCAGTGG                 | 61                  |
| <b>Plxdc2</b>    | F: TCCAACATCAGCAGCCAGCATCT<br>R: CCAGAAATCTCGTCGCCCTTCTGT              | 61                  |
| <b>Timd4</b>     | F: CGTATAGAGGTGCCTGGCTGGTTC<br>R: GGGCACGTGGTCACTGCTGTAC               | 61                  |
| <b>F5</b>        | F: CGCAGGGCTGTAAGTCTCTGTCT<br>R: ACAGCCGAAGAGCTCTAGGCGA                | 61                  |
| <b>Ccnb2</b>     | F:CTGTCTCAGAAGGTGCTGGGCCA<br>R: GCGCAGGATGGCAGTCCAGTGT                 | 61                  |
| <b>Fizz1</b>     | F: GGTCCCAGTGCATATGGATGAGACCATAGA<br>R: CACCTCTTCACTCGAGGGACAGTTGGCAGC | 60                  |
| <b>Ccna2</b>     | F: AGCTTG TAGGCACGGCTGCTATG<br>R: GCAGGTA CTTAAGGTACGGGTCAGCA          | 61                  |
| <b>Hist1h3f</b>  | F: TGGGTGTGCCTGTTTCGGTTTTATTT<br>R: TTTGGCGATACCACAGCGGC               | 57                  |
| <b>Serbinb6b</b> | F: CAAGAAATGCCTTTCAATGTCAC<br>R: ATTTCTTATAAGTTATCTCCTTTTCC            | 51                  |
| <b>CD74</b>      | F: CAT GGA TGA CCA ACG CGA C<br>R: TGT ACA GAG CTC CAC GGC TG          | 58                  |
| <b>Mpp7</b>      | F: CAGGCCTAGGCGGAGATGCTCA<br>R: GCAATGGAGGACCCAGTGAGTGC                | 61                  |
| <b>Ccr2</b>      | F: GGAAGACAATAATATGTTACCTCAGTT<br>R: TGGTGGCCCCCTTCATCAA               | 55                  |
| <b>Tnfsf4</b>    | F: CCCTCCAATCCAAAGACTCA<br>R: ATCCTTCGACCATCGTTCAG                     | 54                  |
| <b>H2-Aa</b>     | F: GGCTCAGAAATAGCAAGTCA<br>R: AATCTCAGGTTCCC                           | 44                  |
| <b>Ccl5</b>      | F: GATGGACATAGAGGACACA ACT<br>R: TGGGACGGCAGATCTGAGGG                  | 60                  |

## B

| <b>Primer</b>   | <b>Sequence</b>                                             | <b>Annealing °C</b> |
|-----------------|-------------------------------------------------------------|---------------------|
| <b>Xcl1</b>     | F: GCAAGACCTCAGCCATGAGA<br>R: GCCGCTGGGTTTGTAAGTTC          | 56                  |
| <b>Ccr7</b>     | F: AGAGCACCATGGACCCAGGGA<br>R: CCGAGCAGGCCACGAAGCA          | 60                  |
| <b>CD209a</b>   | F: ACATCCAGCCACACCAGGCACT<br>R: GGCAGGAGCGGCACAGTCGAT       | 60                  |
| <b>Clec2i</b>   | F: TGCAGAGCCTCCCATGCCAGAT<br>R: ACAGCTACAGTGAGGACCATGATCA   | 60                  |
| <b>Gpnmb</b>    | F: AGCACAACCAATTACGTGGC<br>R: CTTCCCAGGAGTCCTTCCA           | 55                  |
| <b>Ctsk</b>     | F: ACTTGGGAGACATGACCAGTGA<br>R: TCTTGACTGGAGTAACGTATCCTTTC  | 57                  |
| <b>Il1f9</b>    | F: TGACTTGGACCAGCAGGTGTGG<br>R: TGTTCACCTGTCCGGGTGTG        | 61                  |
| <b>Asprv1</b>   | F: AGGAAGGACGCCGGGAGCAT<br>R: AATCGCCCTGGGCTGGGAA           | 61                  |
| <b>Ppap2b</b>   | F: TGACCCCTGGGGCAGTTCCTGG<br>R: ACGGAGTCTGGGAGGGTGTAGATGT   | 61                  |
| <b>Atp6v0d2</b> | F: GAAGCTGTCAACATTGCAGA<br>R: TCACCGTGATCCTTGCAGAAT         | 53                  |
| <b>Ms4a7</b>    | F: TGCCGTCATTGGCCTCTTCCTCT<br>R: GCACAGTGAAGAGAAGCATCATCCCC | 61                  |
| <b>Itgb5</b>    | F: ACCAGGAGGCTGTGCTTTGCT<br>R: ACAGGGGGTTTGAGGCTTTGGA       | 59                  |
| <b>Adam8</b>    | F: AGGATATTCAGCAGGTGTAGCAA<br>R: TGCTAAAGGTATAGCAGGAGTCG    | 56                  |
| <b>Hspb1</b>    | F: AGGATGGCGTGGTGGAGAT<br>R: GATGTAGCCATGCTCGTCCTG          | 56                  |
| <b>Ctsl</b>     | F: GTGGACTGTTCTCACGCTCA<br>R: TATCCACGAACCCTGTGTCA          | 55                  |

C

| <b>Primer</b>           | <b>Sequence</b>                                          | <b>Annealing °C</b> |
|-------------------------|----------------------------------------------------------|---------------------|
| <b>iNOS</b>             | F: CCCTCCTGATCTTGTGTTGGA<br>R: CCACCCGAGCTCCTGGAAC       | 60                  |
| <b>Il12 (p40)</b>       | F: GGAAGCACGGCAGCAGAATA<br>R: AACTTGAGGGAGAAGTAGGAATGG   | 60                  |
| <b>Tnfa</b>             | F: ACAGAAAGCATGATCCGCG<br>R: GCCCCCCATCTTTTGGG           | 60                  |
| <b>Il1b</b>             | F: GTGGCTGTGGAGAAGCTGTG<br>R: GAAGGTCCACGGGAAAGACAC      | 60                  |
| <b>Cox2</b>             | F: ACACACTCTATCACTGGCACC<br>R: TTCAGGGAGAAGCGTTTGC       | 55                  |
| <b>Il6</b>              | F: CCAGAAACCGCTATGAAGTTCC<br>R: TTGTCACCAGCATCAGTCCC     | 60                  |
| <b>Il10</b>             | F: GGTTGCCAAGCCTTATCGGA<br>R: ACCTGCTCCACTGCCTTGCT       | 60                  |
| <b>Ym1</b>              | F: TCACAGGTCTGGCAATTCTTCTG<br>R: TTTGTCCTTAGGAGGGCTTCCTC | 60                  |
| <b>Arg1</b>             | F: CAGAAGAATGGAAGAGTCAG<br>R: CAGATATGCAGGGAGTCACC       | 60                  |
| <b>Mannose Receptor</b> | F: ATGCCAAGTGGGAAAATCTG<br>R: TGTAGCAGTGGCCTGCATAG       | 60                  |
| <b>Il1Ra</b>            | F: CTGGGCCGCACGAGCTTTGA<br>R: CGGGTGACCTTGCTTAGACATGCAG  | 63                  |
| <b>HbEGF</b>            | F: CAGGACTTGGAAGGGACAGA<br>R: GGCATTTGCAAGAGGGAGTA       | 56                  |
| <b>LIGHT</b>            | F: CTGCATCAACGTCTTGAGAGA<br>R: GATACGTCAAGCCCCTCAAG      | 55                  |
| <b>SPHK1</b>            | F: ACAGCAGTGTGCAGTTGATGA<br>R: GGCAGTCATGTCCGGTGATG      | 56                  |
| <b>CYPH</b>             | F: ATGGTCAACCCCACCGTG<br>R: TTCTTGCTGTCTTTGGAACCTTGTC    | 44-63               |
