# Supplementary material
Source: PubMed Central journal article supplement (PMC5362087)
Supplement: NIHMS48620-supplement-Table_S2.pdf [file NIHMS48620-supplement-Table_S2.pdf]

|                               | <b>Fluorochrome</b> | <b>Clone</b> | <b>Supplier</b> |
|-------------------------------|---------------------|--------------|-----------------|
| <b>CD3</b>                    | AlexaFluor 700      | 17A2         | BD              |
| <b>CD8<math>\alpha</math></b> | V500                | 53-6.7       | BD              |
| <b>CD11b</b>                  | V450                | M1/70        | BD              |
| <b>CD11c</b>                  | APC                 | HL3          | BD              |
| <b>CD115</b>                  | PE                  | AFS98        | eBioscience     |
| <b>CD19</b>                   | FITC/PE             | ID3          | BD              |
| <b>CD205</b>                  | PE-Cy7              | 205yekta     | eBioscience     |
| <b>CD209</b>                  | PE                  | LWC06        | eBioscience     |
| <b>CD45R</b>                  | PerCp-Cy5.5         | RA3-6B2      | BD              |
| <b>CD62L</b>                  | PerCp-Cy5.5         | MEL-14       | BD              |
| <b>CD86</b>                   | AlexaFluor 700      | GL1          | BD              |
| <b>F480</b>                   | Pe-Cy7/PerCp-Cy5.5  | BM8          | eBioscience     |
| <b>Ly6b.2 alloantigen</b>     | Biotin              | 7/4          | eBioscience     |
| <b>GR1 (Ly6c + Ly6g)</b>      | Biotin              | RB6-8C5      | BD              |
| <b>Ly6c</b>                   | APC/FITC            | AL-21        | BD              |
| <b>MHC-II (I-Ad, I-Ed)</b>    | PE                  | 2G9          | BD              |
